# Supplementary material
Source: publisher site journal article supplement (https://www.dovepress.com/article/supplementary_file/595212/595212%20Supplementary%20Table%201.docx)
Supplement: Supplementary file 1 [file 595212%20Supplementary%20Table%201.docx]

| Experiment | Comparison | n/group | Test | Effect size(Cohen’s d) | α | Power |
| --- | --- | --- | --- | --- | --- | --- |
| qPCR IL-6 | Sham vs. MIA | 3 | t test | d=4.35 | 0.05 | 0.972 |
| qPCR IL-1β | Sham vs. MIA | 3 | t test | d=5.22 | 0.05 | 0.995 |
| qPCR TNF-ɑ | Sham vs. MIA | 3 | t test | d=5.34 | 0.05 | 0.996 |
| qPCR IL-4 | Sham vs. MIA | 3 | t test | d=7.70 | 0.05 | 0.999 |
| qPCR IL-10 | Sham vs. MIA | 3 | t test | d=3.71 | 0.05 | 0.916 |
| qPCR IL-6 | MIA+tDCS vs. MIA+StDCS | 3 | t test | d=3.52 | 0.05 | 0.889 |
| qPCR IL-1β | MIA+tDCS vs. MIA+StDCS | 3 | t test | d=4.34 | 0.05 | 0.971 |
| qPCR TNF-ɑ | MIA+tDCS vs. MIA+StDCS | 3 | t test | d=4.05 | 0.05 | 0.952 |
| qPCR IL-4 | MIA+tDCS vs. MIA+StDCS | 3 | t test | d=4.31 | 0.05 | 0.970 |
| qPCR IL-10 | MIA+tDCS vs. MIA+StDCS | 3 | t test | d=8.10 | 0.05 | 0.999 |
| (M1) c-Fos | Sham vs. MIA | 3 | t test | d=2.04 | 0.05 | 0.476 |
| (M1) c-Fos | MIA+tDCS vs. MIA+StDCS | 3 | t test | d=6.57 | 0.05 | 0.999 |
| Branches morphological analysis | MIA+Mino vs. MIA+NS | 3 | t test | d=4.67 | 0.05 | 0.985 |
| Endpints morphological analysis | MIA+Mino vs. MIA+NS | 3 | t test | d=3.80 | 0.05 | 0.927 |
| Max branches length | MIA+Mino vs. MIA+NS | 3 | t test | d=3.09 | 0.05 | 0.804 |
| Normalized soma size/cell（µm2） | MIA+Mino vs. MIA+NS | 3 | t test | d=3.51 | 0.05 | 0.887 |
| Microglia counts/mm2 | MIA+Mino vs. MIA+NS | 3 | t test | d=5.90 | 0.05 | 0.999 |

Supplementary Table 1. Post hoc power analysis for the main outcome measures.
